# Supplementary material
Source: PubMed Central journal article supplement (PMC6137533)
Supplement: jamapediatr-172-542-s001.pdf [file jamapediatr-172-542-s001.pdf]

## Supplementary Online Content

Meltzer JA, Stone ME Jr, Reddy SH, Silver EJ. Association of whole body computed tomography with mortality risk in children with blunt trauma. *JAMA Pediatr*. Published online April 9, 2018. doi:10.1001/jamapediatrics.2018.0109

**eTable 1.** List of Excluded Patients Due to Failure of Overlap Assumption in Propensity Score Model

**eTable 2.** Standardized Differences and Variance Ratios for Propensity Model Covariates, Before and After Propensity Weighting: Overall

**eTable 3.** Standardized Differences and Variance Ratios for Propensity Model Covariates, Before and After Propensity Weighting: MVC Pedestrian Subgroup

**eTable 4.** Standardized Differences and Variance Ratios for Propensity Model Covariates, Before and After Propensity Weighting: MVC Occupant Subgroup

**eTable 5.** Standardized Differences and Variance Ratios for Propensity Model Covariates, Before and After Propensity Weighting: Glasgow Coma Scale < 9 Subgroup

**eTable 6.** Standardized Differences and Variance Ratios for Propensity Model Covariates, Before and After Propensity Weighting: Hypotension Subgroup

**eTable 7.** Standardized Differences and Variance Ratios for Propensity Model Covariates, Before and After Propensity Weighting: ICU Admission Subgroup

**eTable 8.** Propensity Score Weighted Mortality Risk for Children Who Received WBCT vs Selective CT: Additionally Adjusted for Injury Severity Score (ISS)

**eTable 9.** Propensity Score Weighted Mortality Risk for Children Who Received WBCT vs Selective CT: Excluding Children with Isolated Head Injury

**eTable 10.** Endogeneity Tests for Presence of Residual Confounding in the Overall and Subgroup Treatment Effects Models

**eAppendix.** Expanded Notes on Methods

This supplementary material has been provided by the authors to give readers additional information about their work.

**eTable 1. List of Excluded Patients Due to Failure of Overlap Assumption in Propensity Score Model.**

| <b>Patient Number</b> | <b>Model Excluded From</b> | <b>Type of CT</b> | <b>Died</b> |
|-----------------------|----------------------------|-------------------|-------------|
| 5308                  | MVC Occupant Subgroup      | Selective CT      | No          |
| 27631                 | MVC Occupant Subgroup      | Selective CT      | No          |
| 27758                 | MVC Occupant Subgroup      | Selective CT      | No          |
| 31068                 | MVC Occupant Subgroup      | Selective CT      | No          |
| 5723                  | GCS < 9 Subgroup           | WBCT              | No          |
| 20362                 | Hypotension Subgroup       | Selective CT      | No          |
| 34906                 | Hypotension Subgroup       | Selective CT      | No          |
| 37077                 | Hypotension Subgroup       | Selective CT      | No          |

**eTable 2. Covariate Standardized Differences and Variance Ratios, Before and After Propensity Weighting: Overall (N= 42,192).<sup>a</sup>**

|                                | Standardized Differences |           | Variance Ratio |           |
|--------------------------------|--------------------------|-----------|----------------|-----------|
|                                | Raw                      | Weighted  | Raw            | Weighted  |
| <b>Age, years</b>              | 0.16                     | 0.03      | 0.95           | 1.04      |
| <b>Sex</b>                     |                          |           |                |           |
| Female                         | Reference                | Reference | Reference      | Reference |
| Male                           | -0.05                    | 0.00      | 1.03           | 1.00      |
| Missing                        | 0.02                     | 0.00      | 2.13           | 0.81      |
| <b>Race</b>                    |                          |           |                |           |
| White                          | Reference                | Reference | Reference      | Reference |
| Black                          | -0.09                    | -0.02     | 0.84           | 0.96      |
| Hispanic/Latino                | 0.02                     | -0.03     | 1.04           | 0.94      |
| Other                          | 0.02                     | 0.00      | 1.07           | 0.99      |
| <b>Mechanism</b>               |                          |           |                |           |
| Other                          | Reference                | Reference | Reference      | Reference |
| Fall from Height               | 0.03                     | -0.01     | 1.17           | 0.97      |
| Fall                           | -0.59                    | -0.03     | 0.38           | 0.96      |
| Assault                        | -0.36                    | 0.00      | 0.31           | 1.00      |
| MVC Pedestrian                 | 0.22                     | 0.01      | 1.57           | 1.02      |
| MVC Occupant                   | 0.44                     | 0.00      | 1.54           | 1.00      |
| MVC Other                      | 0.14                     | 0.00      | 1.64           | 1.02      |
| <b>Payment</b>                 |                          |           |                |           |
| Medicaid/Medicare              | Reference                | Reference | Reference      | Reference |
| Private Insurance              | -0.16                    | -0.01     | 0.93           | 1.00      |
| Other                          | 0.22                     | 0.04      | 1.27           | 1.05      |
| <b>Glasgow Coma Scale</b>      |                          |           |                |           |
| ≥9                             | Reference                | Reference | Reference      | Reference |
| <9                             | 0.36                     | 0.01      | 3.30           | 1.03      |
| Missing                        | -0.04                    | 0.00      | 0.80           | 1.01      |
| <b>Oxygen Saturation</b>       |                          |           |                |           |
| ≥94%                           | Reference                | Reference | Reference      | Reference |
| <94%                           | 0.21                     | 0.02      | 2.30           | 1.10      |
| Missing                        | -0.15                    | -0.05     | 0.65           | 0.87      |
| <b>Hypotension</b>             |                          |           |                |           |
| No                             | Reference                | Reference | Reference      | Reference |
| Yes                            | 0.14                     | 0.02      | 2.24           | 1.09      |
| Missing                        | -0.17                    | -0.01     | 0.26           | 0.94      |
| <b>Assisted Respirations</b>   |                          |           |                |           |
| No                             | Reference                | Reference | Reference      | Reference |
| Yes                            | 0.30                     | 0.03      | 2.82           | 1.12      |
| Missing                        | -0.15                    | -0.04     | 0.56           | 0.86      |
| <b>Chest Tube</b>              | 0.21                     | -0.03     | 8.92           | 0.74      |
| <b>PRBC</b>                    | 0.18                     | -0.01     | 5.33           | 0.92      |
| <b>Plasma</b>                  | 0.12                     | 0.00      | 6.04           | 0.94      |
| <b>Platelets</b>               | 0.08                     | -0.01     | 7.77           | 0.83      |
| <b>Hospital Type</b>           |                          |           |                |           |
| Community                      | Reference                | Reference | Reference      | Reference |
| University                     | -0.18                    | 0.03      | 0.96           | 1.00      |
| Non-teaching                   | 0.02                     | -0.02     | 1.05           | 0.95      |
| <b>Adult Trauma Center</b>     | 0.59                     | 0.05      | 0.50           | 0.96      |
| <b>Pediatric Trauma Center</b> | -0.22                    | -0.04     | 1.01           | 1.01      |

|                                                                                                                                                                                                                                                                                      | Standardized Differences |           | Variance Ratio |           |
|--------------------------------------------------------------------------------------------------------------------------------------------------------------------------------------------------------------------------------------------------------------------------------------|--------------------------|-----------|----------------|-----------|
|                                                                                                                                                                                                                                                                                      | Raw                      | Weighted  | Raw            | Weighted  |
| <b>Region</b>                                                                                                                                                                                                                                                                        |                          |           |                |           |
| Midwest                                                                                                                                                                                                                                                                              | Reference                | Reference | Reference      | Reference |
| Northeast                                                                                                                                                                                                                                                                            | 0.04                     | 0.01      | 1.06           | 1.01      |
| South                                                                                                                                                                                                                                                                                | 0.22                     | -0.03     | 1.16           | 0.98      |
| West                                                                                                                                                                                                                                                                                 | -0.14                    | 0.00      | 0.80           | 0.99      |
| Missing                                                                                                                                                                                                                                                                              | 0.08                     | 0.01      | 1.84           | 1.05      |
| <b>Number of Pediatric Beds</b>                                                                                                                                                                                                                                                      |                          |           |                |           |
| 0                                                                                                                                                                                                                                                                                    | Reference                | Reference | Reference      | Reference |
| 1-10                                                                                                                                                                                                                                                                                 | 0.12                     | 0.00      | 1.37           | 1.00      |
| 11-15                                                                                                                                                                                                                                                                                | -0.02                    | 0.02      | 0.94           | 1.07      |
| 16-30                                                                                                                                                                                                                                                                                | 0.15                     | -0.01     | 1.28           | 0.98      |
| 31-80                                                                                                                                                                                                                                                                                | 0.17                     | 0.06      | 1.29           | 1.09      |
| >80                                                                                                                                                                                                                                                                                  | -0.31                    | -0.05     | 0.87           | 0.98      |
| Missing                                                                                                                                                                                                                                                                              | 0.01                     | 0.00      | 1.24           | 0.99      |
| <b>Interaction - Oxygen Saturation &lt; 94%* Assisted Respirations</b>                                                                                                                                                                                                               |                          |           |                |           |
| ≥94%*No                                                                                                                                                                                                                                                                              | Reference                | Reference | Reference      | Reference |
| <94%*Yes                                                                                                                                                                                                                                                                             | 0.17                     | 0.01      | 4.90           | 1.07      |
| <94%*Missing                                                                                                                                                                                                                                                                         | 0.01                     | -0.02     | 1.23           | 0.62      |
| Missing*Yes                                                                                                                                                                                                                                                                          | 0.06                     | 0.00      | 2.18           | 1.04      |
| Missing*Missing                                                                                                                                                                                                                                                                      | -0.14                    | 0.02      | 0.27           | 1.14      |
| <b>Interaction - Pediatric Trauma Center*Number of Pediatric Beds</b>                                                                                                                                                                                                                |                          |           |                |           |
| 0                                                                                                                                                                                                                                                                                    | Reference                | Reference | Reference      | Reference |
| 1-10                                                                                                                                                                                                                                                                                 | 0.10                     | 0.00      | 5.99           | 1.03      |
| 11-15                                                                                                                                                                                                                                                                                | -0.04                    | 0.00      | 0.19           | 0.88      |
| 16-30                                                                                                                                                                                                                                                                                | 0.08                     | -0.03     | 1.48           | 0.88      |
| 31-80                                                                                                                                                                                                                                                                                | 0.11                     | 0.04      | 1.32           | 1.11      |
| >80                                                                                                                                                                                                                                                                                  | -0.36                    | -0.06     | 0.78           | 0.97      |
| <b>Interaction - Pediatric Trauma Center*Adult Trauma Center</b>                                                                                                                                                                                                                     | 0.23                     | 0.00      | 1.15           | 1.00      |
| <b>Interaction - PRBC*Chest Tube</b>                                                                                                                                                                                                                                                 | 0.09                     | -0.01     | 8.60           | 0.86      |
| Abbreviations: WBCT, Whole Body Computed Tomography; MVC, Motor Vehicle Crash; PRBC, Packed Red Blood Cells.<br><sup>a</sup> Raw Sample: # observations: 42,912 (8,757 WBCT; 34,155 Selective CT); Weighted Sample: # observations: 42,912.0 (20,991.9 WBCT; 21,920.1 Selective CT). |                          |           |                |           |

**eTable 3. Covariate Standardized Differences and Variance Ratios, Before and After Propensity Weighting: MVC Pedestrian Subgroup (N= 5,291).<sup>a</sup>**

|                                | Standardized Differences |           | Variance Ratio |           |
|--------------------------------|--------------------------|-----------|----------------|-----------|
|                                | Raw                      | Weighted  | Raw            | Weighted  |
| <b>Age, years</b>              | 0.05                     | -0.03     | 1.09           | 1.10      |
| <b>Sex</b>                     |                          |           |                |           |
| Female                         | Reference                | Reference | Reference      | Reference |
| Male                           | 0.05                     | 0.00      | 0.97           | 1.00      |
| Missing                        | -0.01                    | 0.00      | 0.75           | 0.87      |
| <b>Race</b>                    |                          |           |                |           |
| White                          | Reference                | Reference | Reference      | Reference |
| Black                          | -0.22                    | -0.02     | 0.80           | 0.98      |
| Hispanic/Latino                | 0.05                     | 0.01      | 1.08           | 1.01      |
| Other                          | 0.00                     | 0.00      | 1.00           | 1.01      |
| <b>Payment</b>                 |                          |           |                |           |
| Medicaid/Medicare              | Reference                | Reference | Reference      | Reference |
| Private Insurance              | -0.01                    | 0.01      | 0.99           | 1.02      |
| Other                          | 0.08                     | 0.05      | 1.05           | 1.03      |
| <b>Glasgow Coma Scale</b>      |                          |           |                |           |
| ≥9                             | Reference                | Reference | Reference      | Reference |
| <9                             | 0.35                     | 0.01      | 2.78           | 1.02      |
| Missing                        | 0.10                     | 0.02      | 1.96           | 1.12      |
| <b>Oxygen Saturation</b>       |                          |           |                |           |
| ≥94%                           | Reference                | Reference | Reference      | Reference |
| <94%                           | 0.21                     | 0.02      | 2.04           | 1.06      |
| Missing                        | -0.09                    | 0.02      | 0.76           | 1.05      |
| <b>Hypotension</b>             |                          |           |                |           |
| No                             | Reference                | Reference | Reference      | Reference |
| Yes                            | 0.14                     | -0.05     | 2.07           | 0.79      |
| Missing                        | -0.01                    | 0.01      | 0.94           | 1.12      |
| <b>Assisted Respirations</b>   |                          |           |                |           |
| No                             | Reference                | Reference | Reference      | Reference |
| Yes                            | 0.27                     | -0.02     | 2.29           | 0.94      |
| Missing                        | -0.24                    | -0.06     | 0.43           | 0.82      |
| <b>Chest Tube</b>              | 0.21                     | -0.02     | 4.37           | 0.88      |
| <b>PRBC</b>                    | 0.18                     | 0.01      | 3.57           | 1.04      |
| <b>Plasma</b>                  | 0.12                     | 0.01      | 4.15           | 1.13      |
| <b>Platelets</b>               | 0.09                     | 0.00      | 5.40           | 0.98      |
| <b>Hospital Type</b>           |                          |           |                |           |
| Community                      | Reference                | Reference | Reference      | Reference |
| University                     | -0.38                    | -0.04     | 1.07           | 1.01      |
| Non-teaching                   | 0.14                     | 0.01      | 1.53           | 1.04      |
| <b>Adult Trauma Center</b>     | 0.58                     | 0.02      | 0.52           | 0.98      |
| <b>Pediatric Trauma Center</b> | -0.36                    | -0.04     | 1.12           | 1.01      |
| <b>Region</b>                  |                          |           |                |           |
| Midwest                        | Reference                | Reference | Reference      | Reference |
| Northeast                      | 0.07                     | 0.00      | 1.08           | 1.00      |
| South                          | 0.16                     | -0.02     | 1.14           | 0.99      |
| West                           | -0.08                    | 0.03      | 0.87           | 1.05      |
| Missing                        | 0.13                     | 0.00      | 2.66           | 1.03      |

|                                                                                                                                                                                                                                                                                 | Standardized Differences |           | Variance Ratio |           |
|---------------------------------------------------------------------------------------------------------------------------------------------------------------------------------------------------------------------------------------------------------------------------------|--------------------------|-----------|----------------|-----------|
|                                                                                                                                                                                                                                                                                 | Raw                      | Weighted  | Raw            | Weighted  |
| <b>Number of Pediatric Beds</b>                                                                                                                                                                                                                                                 |                          |           |                |           |
| 0                                                                                                                                                                                                                                                                               | Reference                | Reference | Reference      | Reference |
| 1-10                                                                                                                                                                                                                                                                            | 0.18                     | 0.02      | 1.75           | 1.08      |
| 11-15                                                                                                                                                                                                                                                                           | 0.09                     | 0.01      | 1.45           | 1.05      |
| 16-30                                                                                                                                                                                                                                                                           | 0.11                     | -0.01     | 1.23           | 0.99      |
| 31-80                                                                                                                                                                                                                                                                           | 0.18                     | 0.04      | 1.32           | 1.06      |
| >80                                                                                                                                                                                                                                                                             | -0.41                    | -0.05     | 0.92           | 0.99      |
| Missing                                                                                                                                                                                                                                                                         | 0.02                     | 0.00      | 1.70           | 1.04      |
| <b>Interaction - Oxygen Saturation &lt; 94%* Assisted Respirations</b>                                                                                                                                                                                                          |                          |           |                |           |
| ≥94%*No                                                                                                                                                                                                                                                                         | Reference                | Reference | Reference      | Reference |
| <94%*Yes                                                                                                                                                                                                                                                                        | 0.14                     | -0.04     | 3.00           | 0.76      |
| <94%*Missing                                                                                                                                                                                                                                                                    | 0.00                     | -0.03     | 0.95           | 0.67      |
| Missing*Yes                                                                                                                                                                                                                                                                     | 0.05                     | 0.00      | 1.62           | 1.03      |
| Missing*Missing                                                                                                                                                                                                                                                                 | -0.15                    | 0.06      | 0.27           | 1.43      |
| <b>Interaction - Pediatric Trauma Center*Number of Pediatric Beds</b>                                                                                                                                                                                                           |                          |           |                |           |
| 0                                                                                                                                                                                                                                                                               | Reference                | Reference | Reference      | Reference |
| 1-10                                                                                                                                                                                                                                                                            | 0.07                     | 0.01      | 4.51           | 1.19      |
| 11-15                                                                                                                                                                                                                                                                           | -0.01                    | 0.00      | 0.75           | 1.07      |
| 16-30                                                                                                                                                                                                                                                                           | 0.03                     | -0.03     | 1.15           | 0.87      |
| 31-80                                                                                                                                                                                                                                                                           | 0.08                     | 0.04      | 1.22           | 1.10      |
| >80                                                                                                                                                                                                                                                                             | -0.45                    | -0.05     | 0.84           | 0.99      |
| <b>Interaction - Pediatric Trauma Center*Adult Trauma Center</b>                                                                                                                                                                                                                | 0.20                     | 0.00      | 1.11           | 1.00      |
| <b>Interaction - PRBC*Chest Tube</b>                                                                                                                                                                                                                                            | 0.11                     | 0.02      | 4.08           | 1.29      |
| Abbreviations: WBCT, Whole Body Computed Tomography; MVC, Motor Vehicle Crash; PRBC, Packed Red Blood Cells.<br><sup>a</sup> Raw Sample: # observations: 5,291 (1,622 WBCT; 3,669 Selective CT); Weighted Sample: # observations: 5,291.0 (2,581.6 WBCT; 2,709.4 Selective CT). |                          |           |                |           |

**eTable 4. Covariate Standardized Differences and Variance Ratios, Before and After Propensity Weighting: MVC Occupant Subgroup (N= 9,844).<sup>a</sup>**

|                                | Standardized Differences |           | Variance Ratio |           |
|--------------------------------|--------------------------|-----------|----------------|-----------|
|                                | Raw                      | Weighted  | Raw            | Weighted  |
| <b>Age, years</b>              | 0.10                     | 0.00      | 1.00           | 0.96      |
| <b>Sex</b>                     |                          |           |                |           |
| Female                         | Reference                | Reference | Reference      | Reference |
| Male                           | 0.02                     | 0.00      | 1.00           | 1.00      |
| Missing                        | 0.01                     | 0.00      | 1.93           | 1.02      |
| <b>Race</b>                    |                          |           |                |           |
| White                          | Reference                | Reference | Reference      | Reference |
| Black                          | -0.16                    | -0.03     | 0.75           | 0.95      |
| Hispanic/Latino                | 0.00                     | 0.00      | 1.01           | 1.00      |
| Other                          | 0.10                     | 0.01      | 1.29           | 1.01      |
| <b>Payment</b>                 |                          |           |                |           |
| Medicaid/Medicare              | Reference                | Reference | Reference      | Reference |
| Private Insurance              | 0.00                     | 0.03      | 1.00           | 1.03      |
| Other                          | 0.04                     | 0.02      | 1.02           | 1.01      |
| <b>Glasgow Coma Scale</b>      |                          |           |                |           |
| ≥9                             | Reference                | Reference | Reference      | Reference |
| <9                             | 0.32                     | -0.03     | 2.49           | 0.93      |
| Missing                        | 0.05                     | 0.01      | 1.34           | 1.09      |
| <b>Oxygen Saturation</b>       |                          |           |                |           |
| ≥94%                           | Reference                | Reference | Reference      | Reference |
| <94%                           | 0.17                     | 0.01      | 1.85           | 1.02      |
| Missing                        | -0.06                    | -0.01     | 0.83           | 0.96      |
| <b>Hypotension</b>             |                          |           |                |           |
| No                             | Reference                | Reference | Reference      | Reference |
| Yes                            | 0.11                     | -0.01     | 1.71           | 0.97      |
| Missing                        | -0.02                    | 0.02      | 0.78           | 1.25      |
| <b>Assisted Respirations</b>   |                          |           |                |           |
| No                             | Reference                | Reference | Reference      | Reference |
| Yes                            | 0.28                     | 0.00      | 2.29           | 0.99      |
| Missing                        | -0.10                    | -0.01     | 0.65           | 0.97      |
| <b>Chest Tube</b>              | 0.18                     | -0.04     | 5.44           | 0.76      |
| <b>PRBC</b>                    | 0.16                     | -0.02     | 3.19           | 0.88      |
| <b>Plasma</b>                  | 0.10                     | 0.00      | 3.33           | 1.00      |
| <b>Platelets</b>               | 0.07                     | -0.01     | 4.41           | 0.77      |
| <b>Hospital Type</b>           |                          |           |                |           |
| Community                      | Reference                | Reference | Reference      | Reference |
| University                     | -0.33                    | 0.00      | 1.01           | 1.00      |
| Non-teaching                   | 0.13                     | 0.00      | 1.39           | 1.01      |
| <b>Adult Trauma Center</b>     | 0.54                     | 0.00      | 0.52           | 1.00      |
| <b>Pediatric Trauma Center</b> | -0.31                    | -0.01     | 1.09           | 1.00      |
| <b>Region</b>                  |                          |           |                |           |
| Midwest                        | Reference                | Reference | Reference      | Reference |
| Northeast                      | 0.04                     | 0.00      | 1.09           | 1.00      |
| South                          | 0.17                     | -0.02     | 1.05           | 0.99      |
| West                           | -0.15                    | -0.02     | 0.78           | 0.97      |
| Missing                        | 0.09                     | 0.00      | 2.00           | 0.96      |

|                                                                                                                                                                                                                                                                                                                                                   | Standardized Differences |           | Variance Ratio |           |
|---------------------------------------------------------------------------------------------------------------------------------------------------------------------------------------------------------------------------------------------------------------------------------------------------------------------------------------------------|--------------------------|-----------|----------------|-----------|
|                                                                                                                                                                                                                                                                                                                                                   | Raw                      | Weighted  | Raw            | Weighted  |
| <b>Number of Pediatric Beds</b>                                                                                                                                                                                                                                                                                                                   |                          |           |                |           |
| 0                                                                                                                                                                                                                                                                                                                                                 | Reference                | Reference | Reference      | Reference |
| 1-10                                                                                                                                                                                                                                                                                                                                              | 0.12                     | 0.00      | 1.50           | 1.01      |
| 11-15                                                                                                                                                                                                                                                                                                                                             | 0.05                     | 0.00      | 1.23           | 1.02      |
| 16-30                                                                                                                                                                                                                                                                                                                                             | 0.24                     | 0.00      | 1.55           | 1.00      |
| 31-80                                                                                                                                                                                                                                                                                                                                             | 0.16                     | 0.02      | 1.28           | 1.04      |
| >80                                                                                                                                                                                                                                                                                                                                               | -0.40                    | -0.03     | 0.93           | 1.00      |
| Missing                                                                                                                                                                                                                                                                                                                                           | 0.04                     | 0.00      | 1.93           | 1.00      |
| <b>Interaction - Oxygen Saturation &lt; 94%* Assisted Respirations</b>                                                                                                                                                                                                                                                                            |                          |           |                |           |
| ≥94%*No                                                                                                                                                                                                                                                                                                                                           | Reference                | Reference | Reference      | Reference |
| <94%*Yes                                                                                                                                                                                                                                                                                                                                          | 0.14                     | 0.01      | 2.70           | 1.04      |
| <94%*Missing                                                                                                                                                                                                                                                                                                                                      | 0.01                     | -0.01     | 1.23           | 0.84      |
| Missing*Yes                                                                                                                                                                                                                                                                                                                                       | 0.07                     | -0.01     | 2.27           | 0.92      |
| Missing*Missing                                                                                                                                                                                                                                                                                                                                   | -0.12                    | 0.05      | 0.27           | 1.47      |
| <b>Interaction - Pediatric Trauma Center*Number of Pediatric Beds</b>                                                                                                                                                                                                                                                                             |                          |           |                |           |
| 0                                                                                                                                                                                                                                                                                                                                                 | Reference                | Reference | Reference      | Reference |
| 1-10                                                                                                                                                                                                                                                                                                                                              | 0.08                     | 0.00      | 4.49           | 1.00      |
| 11-15 <sup>b</sup>                                                                                                                                                                                                                                                                                                                                | -                        | -         | -              | -         |
| 16-30                                                                                                                                                                                                                                                                                                                                             | 0.14                     | 0.00      | 1.97           | 0.99      |
| 31-80                                                                                                                                                                                                                                                                                                                                             | 0.09                     | 0.03      | 1.22           | 1.07      |
| >80                                                                                                                                                                                                                                                                                                                                               | -0.45                    | -0.02     | 0.82           | 0.99      |
| <b>Interaction - Pediatric Trauma Center*Adult Trauma Center</b>                                                                                                                                                                                                                                                                                  | 0.20                     | 0.00      | 1.09           | 1.00      |
| <b>Interaction - PRBC*Chest Tube</b>                                                                                                                                                                                                                                                                                                              | 0.09                     | -0.04     | 5.77           | 0.56      |
| Abbreviations: WBCT, Whole Body Computed Tomography; MVC, Motor Vehicle Crash; PRBC, Packed Red Blood Cells.<br><sup>a</sup> Raw Sample: # observations: 9,844 (3,355 WBCT; 6,489 Selective CT); Weighted Sample: # observations: 9,844.0 (4,875.7 WBCT; 4,968.3 Selective CT).<br><sup>b</sup> No observations for this category in this sample. |                          |           |                |           |



**eTable 5. Covariate Standardized Differences and Variance Ratios, Before and After Propensity Weighting: Glasgow Coma Scale < 9 Subgroup (N= 2,427).<sup>a</sup>**

|                                | Standardized Differences |           | Variance Ratio |           |
|--------------------------------|--------------------------|-----------|----------------|-----------|
|                                | Raw                      | Weighted  | Raw            | Weighted  |
| <b>Age, years</b>              | 0.23                     | 0.00      | 0.85           | 0.96      |
| <b>Sex</b>                     |                          |           |                |           |
| Female                         | Reference                | Reference | Reference      | Reference |
| Male                           | -0.07                    | -0.02     | 1.04           | 1.01      |
| Missing <sup>b</sup>           | -                        | -         | -              | -         |
| <b>Race</b>                    |                          |           |                |           |
| White                          | Reference                | Reference | Reference      | Reference |
| Black                          | -0.18                    | 0.02      | 0.75           | 1.03      |
| Hispanic/Latino                | 0.00                     | -0.02     | 0.99           | 0.96      |
| Other                          | 0.02                     | 0.01      | 1.06           | 1.02      |
| <b>Mechanism</b>               |                          |           |                |           |
| Other                          | Reference                | Reference | Reference      | Reference |
| Fall from Height               | 0.02                     | -0.01     | 1.09           | 0.93      |
| Fall                           | -0.48                    | 0.05      | 0.36           | 1.09      |
| Assault                        | -0.31                    | 0.01      | 0.34           | 1.04      |
| MVC Pedestrian                 | 0.17                     | -0.02     | 1.35           | 0.98      |
| MVC Occupant                   | 0.30                     | -0.02     | 1.22           | 0.99      |
| MVC Other                      | 0.11                     | 0.00      | 1.44           | 0.99      |
| <b>Payment</b>                 |                          |           |                |           |
| Medicaid/Medicare              | Reference                | Reference | Reference      | Reference |
| Private Insurance              | -0.05                    | -0.01     | 0.97           | 1.00      |
| Other                          | 0.14                     | 0.00      | 1.16           | 1.00      |
| <b>Oxygen Saturation</b>       |                          |           |                |           |
| ≥94%                           | Reference                | Reference | Reference      | Reference |
| <94%                           | 0.19                     | -0.01     | 1.29           | 0.99      |
| Missing                        | -0.06                    | 0.00      | 0.84           | 0.99      |
| <b>Hypotension</b>             |                          |           |                |           |
| No                             | Reference                | Reference | Reference      | Reference |
| Yes                            | 0.10                     | -0.01     | 1.32           | 0.97      |
| Missing                        | -0.11                    | -0.04     | 0.34           | 0.69      |
| <b>Assisted Respirations</b>   |                          |           |                |           |
| No                             | Reference                | Reference | Reference      | Reference |
| Yes                            | 0.23                     | -0.02     | 1.00           | 1.00      |
| Missing                        | -0.06                    | 0.02      | 0.77           | 1.07      |
| <b>Chest Tube</b>              | 0.20                     | -0.05     | 2.15           | 0.84      |
| <b>PRBC</b>                    | 0.14                     | 0.00      | 1.47           | 1.00      |
| <b>Plasma</b>                  | 0.10                     | -0.01     | 1.57           | 0.94      |
| <b>Platelets</b>               | 0.11                     | -0.02     | 2.25           | 0.87      |
| <b>Hospital Type</b>           |                          |           |                |           |
| Community                      | Reference                | Reference | Reference      | Reference |
| University                     | -0.26                    | 0.05      | 1.07           | 0.99      |
| Non-teaching                   | 0.14                     | -0.05     | 1.47           | 0.88      |
| <b>Adult Trauma Center</b>     | 0.55                     | -0.01     | 0.54           | 1.01      |
| <b>Pediatric Trauma Center</b> | -0.22                    | 0.02      | 1.11           | 0.99      |

|                                                                                                                                                                                                                                                                                                                                                   | Standardized Differences |           | Variance Ratio |           |
|---------------------------------------------------------------------------------------------------------------------------------------------------------------------------------------------------------------------------------------------------------------------------------------------------------------------------------------------------|--------------------------|-----------|----------------|-----------|
|                                                                                                                                                                                                                                                                                                                                                   | Raw                      | Weighted  | Raw            | Weighted  |
| <b>Region</b>                                                                                                                                                                                                                                                                                                                                     |                          |           |                |           |
| Midwest                                                                                                                                                                                                                                                                                                                                           | Reference                | Reference | Reference      | Reference |
| Northeast                                                                                                                                                                                                                                                                                                                                         | -0.02                    | -0.02     | 0.97           | 0.96      |
| South                                                                                                                                                                                                                                                                                                                                             | 0.11                     | -0.01     | 1.06           | 0.99      |
| West                                                                                                                                                                                                                                                                                                                                              | -0.06                    | 0.02      | 0.92           | 1.03      |
| Missing                                                                                                                                                                                                                                                                                                                                           | 0.12                     | -0.01     | 2.39           | 0.93      |
| <b>Number of Pediatric Beds</b>                                                                                                                                                                                                                                                                                                                   |                          |           |                |           |
| 0                                                                                                                                                                                                                                                                                                                                                 | Reference                | Reference | Reference      | Reference |
| 1-10                                                                                                                                                                                                                                                                                                                                              | 0.11                     | 0.01      | 1.43           | 1.03      |
| 11-15                                                                                                                                                                                                                                                                                                                                             | 0.05                     | -0.02     | 1.26           | 0.89      |
| 16-30                                                                                                                                                                                                                                                                                                                                             | 0.21                     | -0.03     | 1.54           | 0.95      |
| 31-80                                                                                                                                                                                                                                                                                                                                             | -0.01                    | 0.04      | 0.98           | 1.06      |
| >80                                                                                                                                                                                                                                                                                                                                               | -0.24                    | -0.01     | 0.98           | 1.00      |
| Missing                                                                                                                                                                                                                                                                                                                                           | 0.02                     | 0.01      | 1.33           | 1.25      |
| <b>Interaction - Oxygen Saturation &lt; 94%* Assisted Respirations</b>                                                                                                                                                                                                                                                                            |                          |           |                |           |
| ≥94%*No                                                                                                                                                                                                                                                                                                                                           | Reference                | Reference | Reference      | Reference |
| <94%*Yes                                                                                                                                                                                                                                                                                                                                          | 0.17                     | -0.01     | 1.43           | 0.99      |
| <94%*Missing                                                                                                                                                                                                                                                                                                                                      | 0.00                     | -0.01     | 0.98           | 0.88      |
| Missing*Yes                                                                                                                                                                                                                                                                                                                                       | 0.06                     | -0.01     | 1.37           | 0.94      |
| Missing*Missing                                                                                                                                                                                                                                                                                                                                   | -0.05                    | 0.02      | 0.63           | 1.23      |
| <b>Interaction - Pediatric Trauma Center*Number of Pediatric Beds</b>                                                                                                                                                                                                                                                                             |                          |           |                |           |
| 0                                                                                                                                                                                                                                                                                                                                                 | Reference                | Reference | Reference      | Reference |
| 1-10                                                                                                                                                                                                                                                                                                                                              | 0.03                     | 0.00      | 1.77           | 0.96      |
| 11-15 <sup>b</sup>                                                                                                                                                                                                                                                                                                                                | -                        | -         | -              | -         |
| 16-30                                                                                                                                                                                                                                                                                                                                             | 0.22                     | -0.03     | 2.70           | 0.90      |
| 31-80                                                                                                                                                                                                                                                                                                                                             | -0.04                    | 0.05      | 0.92           | 1.11      |
| >80                                                                                                                                                                                                                                                                                                                                               | -0.32                    | -0.01     | 0.91           | 1.00      |
| <b>Interaction - Pediatric Trauma Center*Adult Trauma Center</b>                                                                                                                                                                                                                                                                                  | 0.26                     | 0.00      | 1.12           | 1.00      |
| <b>Interaction - PRBC*Chest Tube</b>                                                                                                                                                                                                                                                                                                              | 0.12                     | -0.03     | 2.46           | 0.81      |
| Abbreviations: WBCT, Whole Body Computed Tomography; MVC, Motor Vehicle Crash; PRBC, Packed Red Blood Cells.<br><sup>a</sup> Raw Sample: # observations: 2,427 (1,176 WBCT; 1,251 Selective CT); Weighted Sample: # observations: 2,427.0 (1,214.9 WBCT; 1,212.1 Selective CT).<br><sup>b</sup> No observations for this category in this sample. |                          |           |                |           |

**eTable 6. Covariate Standardized Differences and Variance Ratios, Before and After Propensity Weighting: Hypotension Subgroup (N= 1,056).<sup>a</sup>**

|                                | Standardized Differences |           | Variance Ratio |           |
|--------------------------------|--------------------------|-----------|----------------|-----------|
|                                | Raw                      | Weighted  | Raw            | Weighted  |
| <b>Age, years</b>              | 0.16                     | 0.02      | 0.95           | 1.06      |
| <b>Sex</b>                     |                          |           |                |           |
| Female                         | Reference                | Reference | Reference      | Reference |
| Male                           | -0.13                    | 0.02      | 1.04           | 0.99      |
| Missing <sup>b</sup>           | -                        | -         | -              | -         |
| <b>Race</b>                    |                          |           |                |           |
| White                          | Reference                | Reference | Reference      | Reference |
| Black                          | -0.14                    | 0.02      | 0.79           | 1.04      |
| Hispanic/Latino                | 0.07                     | -0.03     | 1.15           | 0.93      |
| Other                          | 0.00                     | 0.00      | 1.01           | 1.01      |
| <b>Mechanism</b>               |                          |           |                |           |
| Other                          | Reference                | Reference | Reference      | Reference |
| Fall from Height               | -0.01                    | 0.02      | 0.93           | 1.14      |
| Fall                           | -0.54                    | -0.03     | 0.27           | 0.95      |
| Assault                        | -0.25                    | 0.13      | 0.42           | 1.41      |
| MVC Pedestrian                 | 0.21                     | -0.06     | 1.46           | 0.90      |
| MVC Occupant                   | 0.31                     | -0.01     | 1.21           | 0.99      |
| MVC Other                      | 0.13                     | 0.03      | 1.54           | 1.11      |
| <b>Payment</b>                 |                          |           |                |           |
| Medicaid/Medicare              | Reference                | Reference | Reference      | Reference |
| Private Insurance              | -0.15                    | -0.03     | 0.93           | 0.98      |
| Other                          | 0.16                     | 0.02      | 1.15           | 1.02      |
| <b>Glasgow Coma Scale</b>      |                          |           |                |           |
| ≥9                             | Reference                | Reference | Reference      | Reference |
| <9                             | 0.43                     | -0.02     | 1.70           | 0.97      |
| Missing                        | -0.02                    | 0.11      | 0.89           | 1.68      |
| <b>Oxygen Saturation</b>       |                          |           |                |           |
| ≥94%                           | Reference                | Reference | Reference      | Reference |
| <94%                           | 0.48                     | 0.00      | 2.32           | 1.00      |
| Missing                        | -0.17                    | 0.05      | 0.56           | 1.16      |
| <b>Assisted Respirations</b>   |                          |           |                |           |
| No                             | Reference                | Reference | Reference      | Reference |
| Yes                            | 0.43                     | 0.10      | 1.80           | 1.13      |
| Missing                        | -0.25                    | -0.02     | 0.38           | 0.93      |
| <b>Chest Tube</b>              | 0.36                     | -0.03     | 4.62           | 0.90      |
| <b>PRBC</b>                    | 0.41                     | -0.01     | 2.87           | 0.98      |
| <b>Plasma</b>                  | 0.30                     | 0.00      | 3.93           | 1.01      |
| <b>Platelets</b>               | 0.22                     | 0.03      | 4.41           | 1.23      |
| <b>Hospital Type</b>           |                          |           |                |           |
| Community                      | Reference                | Reference | Reference      | Reference |
| University                     | -0.19                    | 0.06      | 1.03           | 0.98      |
| Non-teaching                   | 0.05                     | -0.05     | 1.16           | 0.85      |
| <b>Adult Trauma Center</b>     | 0.48                     | -0.03     | 0.64           | 1.02      |
| <b>Pediatric Trauma Center</b> | -0.20                    | 0.05      | 1.07           | 0.98      |

|                                                                        | Standardized Differences |           | Variance Ratio |           |
|------------------------------------------------------------------------|--------------------------|-----------|----------------|-----------|
|                                                                        | Raw                      | Weighted  | Raw            | Weighted  |
| <b>Region</b>                                                          |                          |           |                |           |
| Midwest                                                                | Reference                | Reference | Reference      | Reference |
| Northeast                                                              | -0.01                    | 0.06      | 0.98           | 1.12      |
| South                                                                  | 0.29                     | -0.03     | 1.18           | 0.98      |
| West                                                                   | -0.15                    | 0.06      | 0.81           | 1.08      |
| Missing                                                                | 0.13                     | -0.01     | 3.33           | 0.90      |
| <b>Number of Pediatric Beds</b>                                        |                          |           |                |           |
| 0                                                                      | Reference                | Reference | Reference      | Reference |
| 1-10                                                                   | 0.00                     | -0.03     | 1.01           | 0.91      |
| 11-15                                                                  | -0.06                    | -0.03     | 0.78           | 0.89      |
| 16-30                                                                  | 0.22                     | 0.02      | 1.56           | 1.04      |
| 31-80                                                                  | 0.13                     | -0.02     | 1.22           | 0.97      |
| >80                                                                    | -0.27                    | 0.03      | 0.98           | 1.00      |
| Missing                                                                | -0.03                    | -0.03     | 0.56           | 0.62      |
| <b>Interaction - Oxygen Saturation &lt; 94%* Assisted Respirations</b> |                          |           |                |           |
| ≥94%*No                                                                | Reference                | Reference | Reference      | Reference |
| <94%*Yes                                                               | 0.34                     | 0.00      | 3.12           | 1.00      |
| <94%*Missing                                                           | 0.04                     | -0.02     | 1.68           | 0.77      |
| Missing*Yes                                                            | 0.00                     | -0.01     | 1.01           | 0.90      |
| Missing*Missing                                                        | -0.20                    | 0.09      | 0.10           | 1.81      |
| <b>Interaction - Pediatric Trauma Center*Number of Pediatric Beds</b>  |                          |           |                |           |
| 0                                                                      | Reference                | Reference | Reference      | Reference |
| 1-10 <sup>b</sup>                                                      | -                        | -         | -              | -         |
| 11-15 <sup>b</sup>                                                     | -                        | -         | -              | -         |
| 16-30                                                                  | 0.09                     | 0.01      | 1.57           | 1.07      |
| 31-80                                                                  | 0.09                     | 0.00      | 1.27           | 1.00      |
| >80                                                                    | -0.30                    | 0.05      | 0.91           | 1.01      |
| <b>Interaction - Pediatric Trauma Center*Adult Trauma Center</b>       | 0.23                     | 0.02      | 1.14           | 1.01      |
| <b>Interaction - PRBC* Chest Tube</b>                                  | 0.21                     | 0.01      | 5.73           | 1.11      |

Abbreviations: WBCT, Whole Body Computed Tomography; MVC, Motor Vehicle Crash; PRBC, Packed Red Blood Cells.  
<sup>a</sup> Raw Sample: # observations: 1,056 (393 WBCT; 663 Selective CT); Weighted Sample: # observations: 1,056.0 (523.9 WBCT, 532.1 Selective CT).  
<sup>b</sup> No observations for this category in this sample.

**eTable 7. Covariate Standardized Differences and Variance Ratios, Before and After Propensity Weighting: ICU Admission Subgroup (N= 11,106).<sup>a</sup>**

|                                | Standardized Differences |           | Variance Ratio |           |
|--------------------------------|--------------------------|-----------|----------------|-----------|
|                                | Raw                      | Weighted  | Raw            | Weighted  |
| <b>Age, years</b>              | 0.21                     | 0.02      | 0.94           | 1.03      |
| <b>Sex</b>                     |                          |           |                |           |
| Female                         | Reference                | Reference | Reference      | Reference |
| Male                           | -0.05                    | -0.02     | 1.03           | 1.01      |
| Missing                        | -0.01                    | 0.01      | 0.51           | 1.41      |
| <b>Race</b>                    |                          |           |                |           |
| White                          | Reference                | Reference | Reference      | Reference |
| Black                          | -0.13                    | -0.02     | 0.79           | 0.96      |
| Hispanic/Latino                | -0.01                    | -0.04     | 0.98           | 0.93      |
| Other                          | 0.04                     | 0.01      | 1.12           | 1.02      |
| <b>Mechanism</b>               |                          |           |                |           |
| Other                          | Reference                | Reference | Reference      | Reference |
| Fall from Height               | -0.05                    | -0.01     | 0.81           | 0.97      |
| Fall                           | -0.52                    | -0.01     | 0.37           | 0.98      |
| Assault                        | -0.32                    | 0.03      | 0.32           | 1.07      |
| MVC Pedestrian                 | 0.14                     | 0.00      | 1.29           | 1.01      |
| MVC Occupant                   | 0.41                     | -0.02     | 1.39           | 0.98      |
| MVC Other                      | 0.11                     | 0.01      | 1.46           | 1.03      |
| <b>Payment</b>                 |                          |           |                |           |
| Medicaid/Medicare              | Reference                | Reference | Reference      | Reference |
| Private Insurance              | -0.11                    | 0.03      | 0.95           | 1.01      |
| Other                          | 0.14                     | 0.00      | 1.18           | 1.00      |
| <b>Glasgow Coma Scale</b>      |                          |           |                |           |
| ≥9                             | Reference                | Reference | Reference      | Reference |
| <9                             | 0.32                     | 0.02      | 1.68           | 1.03      |
| Missing                        | 0.02                     | 0.02      | 1.11           | 1.11      |
| <b>Oxygen Saturation</b>       |                          |           |                |           |
| ≥94%                           | Reference                | Reference | Reference      | Reference |
| <94%                           | 0.20                     | 0.01      | 1.69           | 1.02      |
| Missing                        | -0.07                    | 0.01      | 0.79           | 1.02      |
| <b>Hypotension</b>             |                          |           |                |           |
| No                             | Reference                | Reference | Reference      | Reference |
| Yes                            | 0.15                     | 0.03      | 1.85           | 1.11      |
| Missing                        | -0.13                    | -0.03     | 0.29           | 0.81      |
| <b>Assisted Respirations</b>   |                          |           |                |           |
| No                             | Reference                | Reference | Reference      | Reference |
| Yes                            | 0.31                     | 0.04      | 1.75           | 1.07      |
| Missing                        | -0.22                    | -0.05     | 0.37           | 0.83      |
| <b>Chest Tube</b>              | 0.23                     | -0.04     | 4.82           | 0.79      |
| <b>PRBC</b>                    | 0.18                     | 0.00      | 2.65           | 0.98      |
| <b>Plasma</b>                  | 0.14                     | -0.01     | 3.49           | 0.90      |
| <b>Platelets</b>               | 0.10                     | -0.02     | 5.31           | 0.72      |
| <b>Hospital Type</b>           |                          |           |                |           |
| Community                      | Reference                | Reference | Reference      | Reference |
| University                     | -0.21                    | 0.02      | 1.07           | 0.99      |
| Non-teaching                   | 0.07                     | -0.01     | 1.24           | 0.96      |
| <b>Adult Trauma Center</b>     | 0.58                     | 0.02      | 0.44           | 0.97      |
| <b>Pediatric Trauma Center</b> | -0.27                    | -0.02     | 1.22           | 1.02      |

|                                                                                                                                                                                                                                                                                   | Standardized Differences |           | Variance Ratio |           |
|-----------------------------------------------------------------------------------------------------------------------------------------------------------------------------------------------------------------------------------------------------------------------------------|--------------------------|-----------|----------------|-----------|
|                                                                                                                                                                                                                                                                                   | Raw                      | Weighted  | Raw            | Weighted  |
| <b>Region</b>                                                                                                                                                                                                                                                                     |                          |           |                |           |
| Midwest                                                                                                                                                                                                                                                                           | Reference                | Reference | Reference      | Reference |
| Northeast                                                                                                                                                                                                                                                                         | -0.02                    | 0.01      | 0.96           | 1.01      |
| South                                                                                                                                                                                                                                                                             | 0.27                     | 0.02      | 1.17           | 1.01      |
| West                                                                                                                                                                                                                                                                              | -0.18                    | -0.03     | 0.77           | 0.96      |
| Missing                                                                                                                                                                                                                                                                           | 0.16                     | 0.01      | 4.53           | 1.11      |
| <b>Number of Pediatric Beds</b>                                                                                                                                                                                                                                                   |                          |           |                |           |
| 0                                                                                                                                                                                                                                                                                 | Reference                | Reference | Reference      | Reference |
| 1-10                                                                                                                                                                                                                                                                              | 0.06                     | 0.00      | 1.34           | 0.98      |
| 11-15                                                                                                                                                                                                                                                                             | 0.04                     | -0.01     | 1.23           | 0.93      |
| 16-30                                                                                                                                                                                                                                                                             | 0.17                     | -0.02     | 1.40           | 0.96      |
| 31-80                                                                                                                                                                                                                                                                             | 0.11                     | 0.05      | 1.14           | 1.05      |
| >80                                                                                                                                                                                                                                                                               | -0.27                    | -0.03     | 1.00           | 1.00      |
| Missing                                                                                                                                                                                                                                                                           | 0.07                     | 0.01      | 7.14           | 1.43      |
| <b>Interaction - Oxygen Saturation &lt; 94%* Assisted Respirations</b>                                                                                                                                                                                                            |                          |           |                |           |
| ≥94%*No                                                                                                                                                                                                                                                                           | Reference                | Reference | Reference      | Reference |
| <94%*Yes                                                                                                                                                                                                                                                                          | 0.18                     | 0.02      | 2.61           | 1.10      |
| <94%*Missing                                                                                                                                                                                                                                                                      | -0.06                    | -0.05     | 0.41           | 0.47      |
| Missing*Yes                                                                                                                                                                                                                                                                       | 0.05                     | 0.01      | 1.59           | 1.10      |
| Missing*Missing                                                                                                                                                                                                                                                                   | -0.09                    | 0.05      | 0.38           | 1.46      |
| <b>Interaction - Pediatric Trauma Center*Number of Pediatric Beds</b>                                                                                                                                                                                                             |                          |           |                |           |
| 0                                                                                                                                                                                                                                                                                 | Reference                | Reference | Reference      | Reference |
| 1-10                                                                                                                                                                                                                                                                              | 0.03                     | 0.01      | 6.13           | 1.63      |
| 11-15                                                                                                                                                                                                                                                                             | -0.06                    | -0.03     | 0.19           | 0.46      |
| 16-30                                                                                                                                                                                                                                                                             | 0.04                     | -0.03     | 1.13           | 0.90      |
| 31-80                                                                                                                                                                                                                                                                             | 0.07                     | 0.03      | 1.15           | 1.06      |
| >80                                                                                                                                                                                                                                                                               | -0.32                    | -0.03     | 0.92           | 0.99      |
| <b>Interaction - Pediatric Trauma Center*Adult Trauma Center</b>                                                                                                                                                                                                                  | 0.24                     | 0.00      | 1.02           | 1.00      |
| <b>Interaction - PRBC*Chest Tube</b>                                                                                                                                                                                                                                              | 0.10                     | -0.03     | 4.69           | 0.67      |
| Abbreviations: WBCT, Whole Body Computed Tomography; MVC, Motor Vehicle Crash; PRBC, Packed Red Blood Cells.<br><sup>a</sup> Raw Sample: # observations: 11,106 (3,646 WBCT; 7,460 Selective CT); Weighted Sample: # observations: 11,106.0 (5,475.6 WBCT; 5,630.4 Selective CT). |                          |           |                |           |

**eTable 8. Propensity Score Weighted Mortality Risk for Children Who Received WBCT vs Selective CT: Additionally Adjusted for Injury Severity Score (ISS).<sup>a</sup>**

|                                                                                                                                                                                                        | <b>N</b> | <b>WBCT<br/>n (%)</b> | <b>Selective CT<br/>n (%)</b> | <b>Absolute Risk<br/>Difference,<br/>% (95% CI)</b> | <b>Relative<br/>Risk,<br/>(95% CI)</b> |
|--------------------------------------------------------------------------------------------------------------------------------------------------------------------------------------------------------|----------|-----------------------|-------------------------------|-----------------------------------------------------|----------------------------------------|
| <b>Unadjusted Sample</b>                                                                                                                                                                               | 42,912   | 228 (2.6)             | 177 (0.5)                     | 2.1 (1.7, 2.4)                                      | 5.0 (4.1, 6.1)                         |
| <b>Adjusted Samples</b>                                                                                                                                                                                |          |                       |                               |                                                     |                                        |
| Overall                                                                                                                                                                                                | 42,912   | 215 (1.0)             | 267 (1.2)                     | -0.2 (-0.5, 0.1)                                    | 0.9 (0.7, 1.1)                         |
| Mechanism                                                                                                                                                                                              |          |                       |                               |                                                     |                                        |
| MVC pedestrian                                                                                                                                                                                         | 5,291    | 50 (1.9)              | 69 (2.5)                      | -0.6 (-1.4, 0.2)                                    | 0.8 (0.5, 1.1)                         |
| MVC occupant                                                                                                                                                                                           | 9,844    | 95 (2.0)              | 88 (1.8)                      | 0.2 (-0.4, 0.8)                                     | 1.1 (0.8, 1.6)                         |
| GCS < 9                                                                                                                                                                                                | 2,427    | 168 (13.9)            | 190 (15.7)                    | -1.8 (-4.8, 1.2)                                    | 0.9 (0.7, 1.1)                         |
| Hypotension                                                                                                                                                                                            | 1,056    | 53 (10.7)             | 63 (11.3)                     | -0.7 (-5.0, 3.6)                                    | 0.9 (0.6, 1.4)                         |
| Admitted to ICU                                                                                                                                                                                        | 11,106   | 177 (3.2)             | 209 (3.7)                     | -0.5 (-1.4, 0.4)                                    | 0.9 (0.7, 1.1)                         |
| Abbreviations: WBCT, Whole Body Computed Tomography; CI, Confidence Interval; MVC, Motor Vehicle Crash; GCS, Glasgow Coma Scale; ICU, Intensive Care Unit; ISS, Injury Severity Score.                 |          |                       |                               |                                                     |                                        |
| <sup>a</sup> Adjusted for original covariates/interactions and additionally adjusted for ISS as well as its interaction with mechanism, GCS, assisted respirations, hypotension, and PRBC transfusion. |          |                       |                               |                                                     |                                        |

**eTable 9. Propensity Score Weighted Mortality Risk for Children Who Received WBCT vs Selective CT: Excluding Children with Isolated Head Injury.<sup>a</sup>**

|                                                                                                                                                                                        | <b>N</b> | <b>WBCT<br/>n (%)</b> | <b>Selective CT<br/>n (%)</b> | <b>Absolute Risk<br/>Difference,<br/>% (95% CI)</b> | <b>Relative<br/>Risk,<br/>(95% CI)</b> |
|----------------------------------------------------------------------------------------------------------------------------------------------------------------------------------------|----------|-----------------------|-------------------------------|-----------------------------------------------------|----------------------------------------|
| <b>Unadjusted Sample</b>                                                                                                                                                               | 31,130   | 222 (2.8)             | 159 (0.7)                     | 2.1 (1.8, 2.5)                                      | 4.1 (3.4, 5.0)                         |
| <b>Adjusted Samples</b>                                                                                                                                                                |          |                       |                               |                                                     |                                        |
| Overall                                                                                                                                                                                | 31,130   | 204 (1.3)             | 267 (1.7)                     | -0.4 (-0.8, 0.1)                                    | 0.8 (0.6, 1.1)                         |
| Mechanism                                                                                                                                                                              |          |                       |                               |                                                     |                                        |
| MVC pedestrian                                                                                                                                                                         | 4,798    | 55 (2.3)              | 82 (3.3)                      | -1.0 (-2.3, 0.4)                                    | 0.7 (0.5, 1.1)                         |
| MVC occupant                                                                                                                                                                           | 8,817    | 95 (2.2)              | 78 (1.7)                      | 0.4 (-0.4, 1.3)                                     | 1.3 (0.8, 1.9)                         |
| GCS < 9                                                                                                                                                                                | 1,921    | 172 (18.1)            | 170 (17.5)                    | 0.6 (-3.5, 4.7)                                     | 1.0 (0.8, 1.3)                         |
| Hypotension                                                                                                                                                                            | 858      | 59 (14.0)             | 55 (12.7)                     | 1.3 (-3.5, 6.1)                                     | 1.1 (0.8, 1.6)                         |
| Admitted to ICU                                                                                                                                                                        | 8,619    | 169 (4.0)             | 193 (4.4)                     | -0.5 (-1.6, 0.7)                                    | 0.9 (0.7, 1.2)                         |
| Abbreviations: WBCT, Whole Body Computed Tomography; CI, Confidence Interval; MVC, Motor Vehicle Crash; GCS, Glasgow Coma Scale; ICU, Intensive Care Unit; ISS, Injury Severity Score. |          |                       |                               |                                                     |                                        |
| <sup>a</sup> . Excludes 11,782 (27.5%) of overall sample.                                                                                                                              |          |                       |                               |                                                     |                                        |



**eTable 10. Endogeneity Tests for Presence of Residual Confounding in the Overall and Subgroup Treatment Effects Models.**

|                                                                                             | <b>N</b> | <b>Test for Endogeneity<br/><i>P</i></b> |
|---------------------------------------------------------------------------------------------|----------|------------------------------------------|
| <b>Overall</b>                                                                              | 42,192   | 0.63                                     |
| <b>Subgroup</b>                                                                             |          |                                          |
| Mechanism                                                                                   |          |                                          |
| MVC pedestrian                                                                              | 5,291    | 0.46                                     |
| MVC occupant                                                                                | 9,844    | 0.77                                     |
| GCS < 9                                                                                     | 2,427    | 0.89                                     |
| Hypotension                                                                                 | 1,056    | 0.57                                     |
| Admitted to ICU                                                                             | 11,106   | 0.91                                     |
| Abbreviations: MVC, Motor Vehicle Crash; GCS, Glasgow Coma Scale; ICU, Intensive Care Unit. |          |                                          |

## **eAppendix. Expanded Notes on Methods**

### **Data Source and Design**

The NTDB compiles data annually from over 700 facilities across the US and Canada. The NTDB dataset includes only injured patients who were admitted to the hospital, died after evaluation in the emergency department (ED), or were dead on arrival to the ED. Participating hospitals submit their data using a standardized methodology and the data is then cleaned and validated before being released.<sup>1</sup>

### **Study Patients**

Children between the ages of 6 months and 14 years with a history of sustaining blunt trauma were eligible for analysis. We chose to study this particular age group for several reasons. First, we did not want to include infants who may have multiple comorbidities from birth or prematurity, or who were inadvertently included in the database due to birth trauma. In addition, the American College of Surgeons, the credentialing body for most US trauma centers, uses <15 years as its age cutoff when considering the hospital's volume count of pediatric patients for trauma designation.<sup>2</sup> Furthermore, we chose to study only blunt trauma patients as penetrating trauma often results in local injury and rarely necessitates a WBCT. Patients who sustained both blunt and penetrating trauma, however, were included.

### **Procedures**

International Classification of Diseases, 9th Revision, (ICD-9) procedure codes were used to identify patients who received the following procedures: CT Head, 87.03, 87.04; CT Chest, 87.41, 87.42; CT Abdomen/Pelvis, 88.01, 88.02; CT Other, 88.38; CT kidney, 87.71; Packed Red Blood Cells [PRBC] transfusion, 99.04; Plasma transfusion, 99.07; Platelet transfusion, 99.05; Chest tube thoracostomy, 34.04.

### **Covariate Definitions**

The mechanism of injury was ascertained using E-codes supplied by the NTDB. We dichotomized the covariate GCS at 9, a clinically important cut-point, because it did not satisfy the logistic regression model assumption of linearity. Hypoxia was defined as an initial oxygen saturation < 94% recorded by Emergency Medical Services (EMS) or in the ED. Patients were categorized as having hypotension if they had an initial systolic blood pressure measured by EMS or ED providers that was below 90 mmHg for children  $\geq 10$  years-old, or  $70\text{mmHg} + (2 \times \text{age in years})$  for children < 10 years-old.<sup>3,4</sup> In addition, patients were classified as receiving PRBC, plasma, platelets, or a chest tube thoracostomy, if it was received within two hours of ED arrival. If an intervention was received after two hours of arrival, it was not counted as a "positive" so as not to include procedures that were performed after WBCT and thus potentially influenced by its results.

A facility was classified as a trauma center if it was noted to be either a state or American College of Surgeons designated Level I or Level II trauma center. In addition, we used the assisted respirations status, hospital region, and pediatric beds categories as provided by the NTDB.

### **Sensitivity Analyses**

In our first sensitivity analysis, we examined the effect of adding the Injury Severity Score (ISS) to our propensity models. Several authors have advised against adjusting for the Injury Severity Score (ISS) when examining the association of mortality and WBCT.<sup>5,6</sup> The ISS is calculated from injury diagnosis codes after-the-fact and is not readily available to the clinician while caring for the injured patient. Because the score itself can be affected by the WBCT exposure status, adjusting for it could result in a differential misclassification bias. In other words, two identically injured patients may have vastly different ISS solely due to whether or not they received a WBCT which may identify more, not necessarily lethal, injuries and thus increase the score. In our primary analysis, we therefore chose not adjust for ISS but rather adjusted for several other covariates that could act as surrogates for injury severity but would be realized prior to the intervention and thus not affected by it. In this sensitivity analysis, we

examined whether additionally adjusting for ISS would substantively affect our results. To accomplish this, we included ISS in our propensity model along with its clinically plausible interactions with mechanism, GCS <9, need for assisted respirations, hypotension, and PRBC transfusion. All interactions were first examined individually as product terms in the propensity model, found to be statistically significant ( $p < 0.01$ ), and thus remained in the model.

In our second sensitivity analysis, we evaluated the association of WBCT and mortality in children excluding those with isolated head injury. Head injury is the leading cause of death from blunt trauma and when occurring in isolation rarely necessitates WBCT.<sup>7</sup> We identified patients as having isolated head injuries if they had only Abbreviated Injury Scale (AIS) codes for the region of the head (100000 through 199999) but no AIS codes for any other region.

In our third sensitivity analysis, we sought to examine statistically whether there were any important confounding variables that were unaccounted for in the propensity model. One assumption of propensity scores models and treatment effect estimators is the lack of residual or “unmeasured” confounding. To examine for this type of endogeneity,<sup>8</sup> we employed a different procedure to estimate the treatment effect. Using the “control-function” approach incorporated into STATA’s *endogenous* treatment effects commands, the residuals from a probit regression model with treatment (WBCT) as the dependent variable were included in a probit regression model with the outcome (death) as the dependent variable.<sup>9</sup> Both models included all aforementioned covariates; significant interaction terms were included in the treatment model only. We then performed a post-estimation test of endogeneity to examine for the presence of significant correlation between the two models which would indicate the presence of significant residual confounding. When endogeneity is present, the control-function approach will yield more accurate results by adjusting for the effect of these unmeasured confounders. When there is no endogeneity, however, it is preferable to use inverse probability weighting to estimate the treatment effect because this method will provide more valid standard errors.

## eReferences.

1. National Trauma Data Bank. *National Trauma Data Bank User Manual: Admission Years 2002-2014*. Chicago, IL: Committee on Trauma, American College of Surgeons; 2015.
2. Rotondo M, Cribari C, Smith R, eds. *Resources for the Optimal Care of the Injured Patient*. 6th ed. Chicago, IL: American College of Surgeons; 2014.
3. Committee on Trauma - American College of Surgeons. *Advanced Trauma Life Support (ATLS)® Student Course Manual. Ninth Edition*. Chicago, IL.: American College of Surgeons; 2012.
4. *Pediatric Advanced Life Support: Provider Manual*. Dallas, TX: American Heart Association; 2016.
5. Yeguiayan JM, Yap A, Freysz M, et al. Impact of whole-body computed tomography on mortality and surgical management of severe blunt trauma. *Crit Care*. Jun 11 2012;16(3):R101.
6. Stengel D, Frank M, Matthes G, et al. Primary pan-computed tomography for blunt multiple trauma: can the whole be better than its parts? *Injury*. Nov 2009;40 Suppl 4:S36-46.
7. Sathya C, Alali AS, Wales PW, et al. Mortality Among Injured Children Treated at Different Trauma Center Types. *JAMA Surg*. Sep 2015;150(9):874-881.
8. Gunasekara FI, Carter K, Blakely T. Glossary for econometrics and epidemiology. *J Epidemiol Community Health*. Oct 2008;62(10):858-861.
9. Terza JV, Basu A, Rathouz PJ. Two-stage residual inclusion estimation: addressing endogeneity in health econometric modeling. *J Health Econ*. May 2008;27(3):531-543.
